# Supplementary material
Source: PubMed Central journal article supplement (PMC3400020)

## Blots of Figure 2

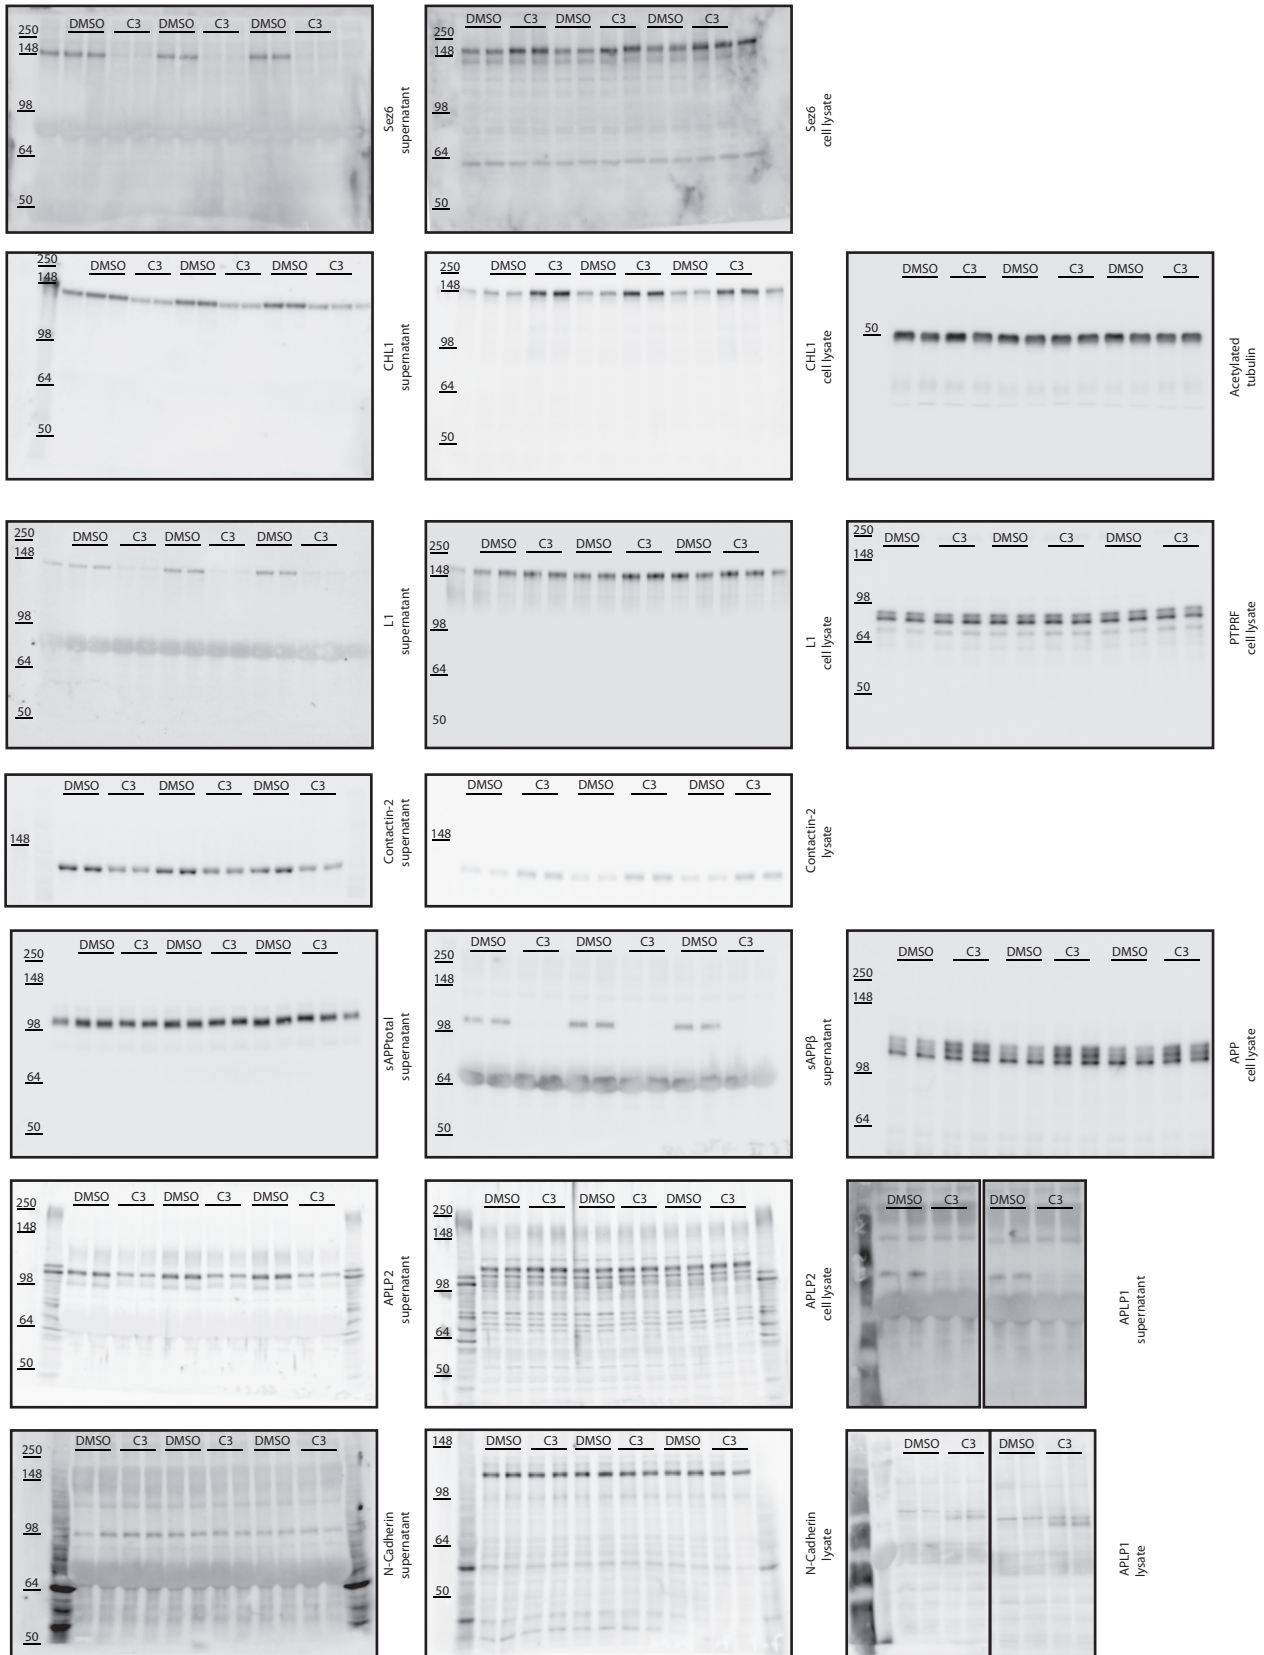

Supplement: emboj2012173s10.pdf [file emboj2012173s10.pdf]

# Blots of Figure 3

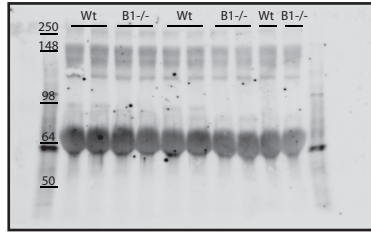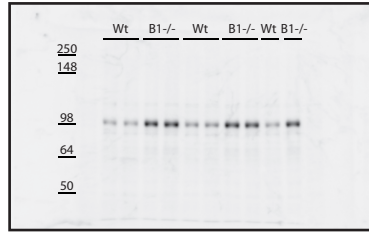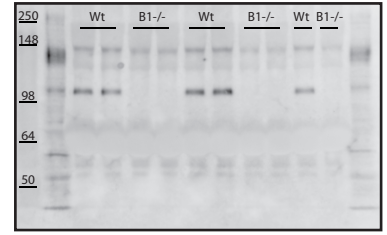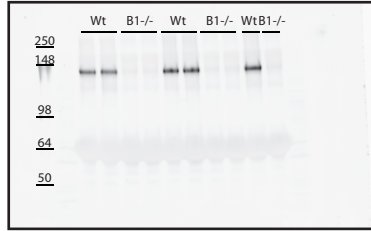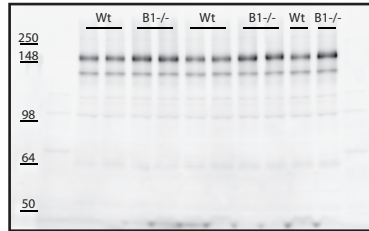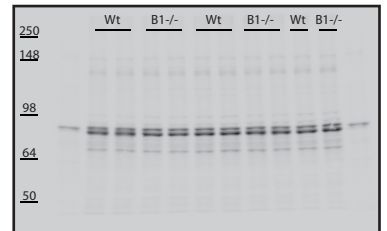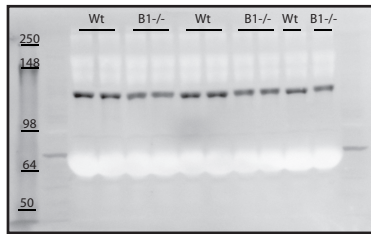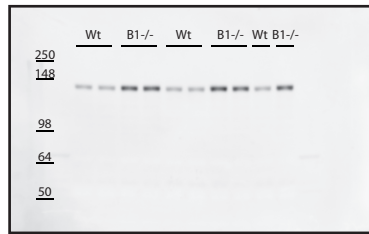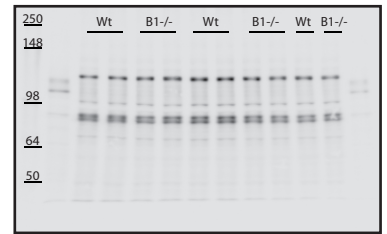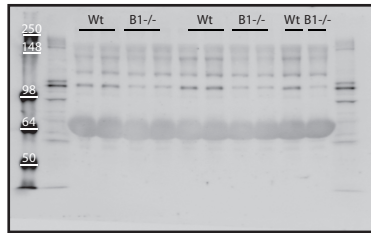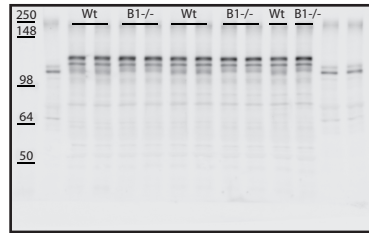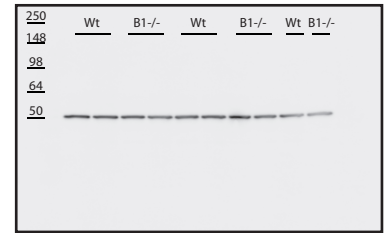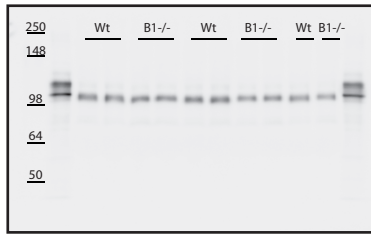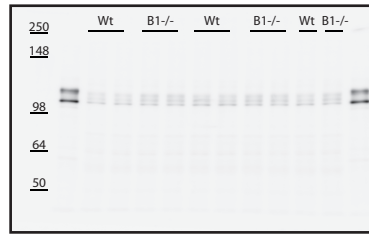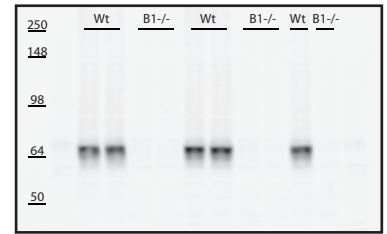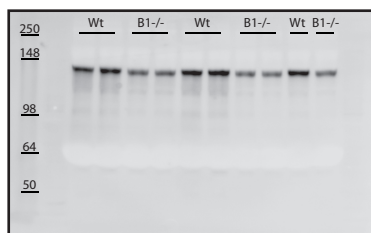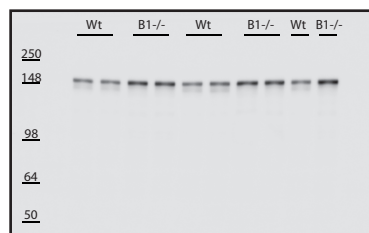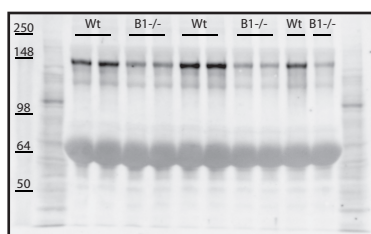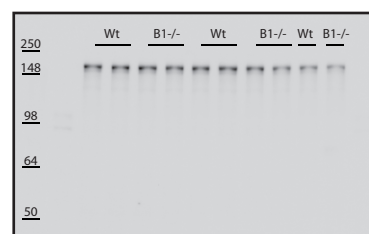

Supplement: emboj2012173s11.pdf [file emboj2012173s11.pdf]

# Blots of Figure 4

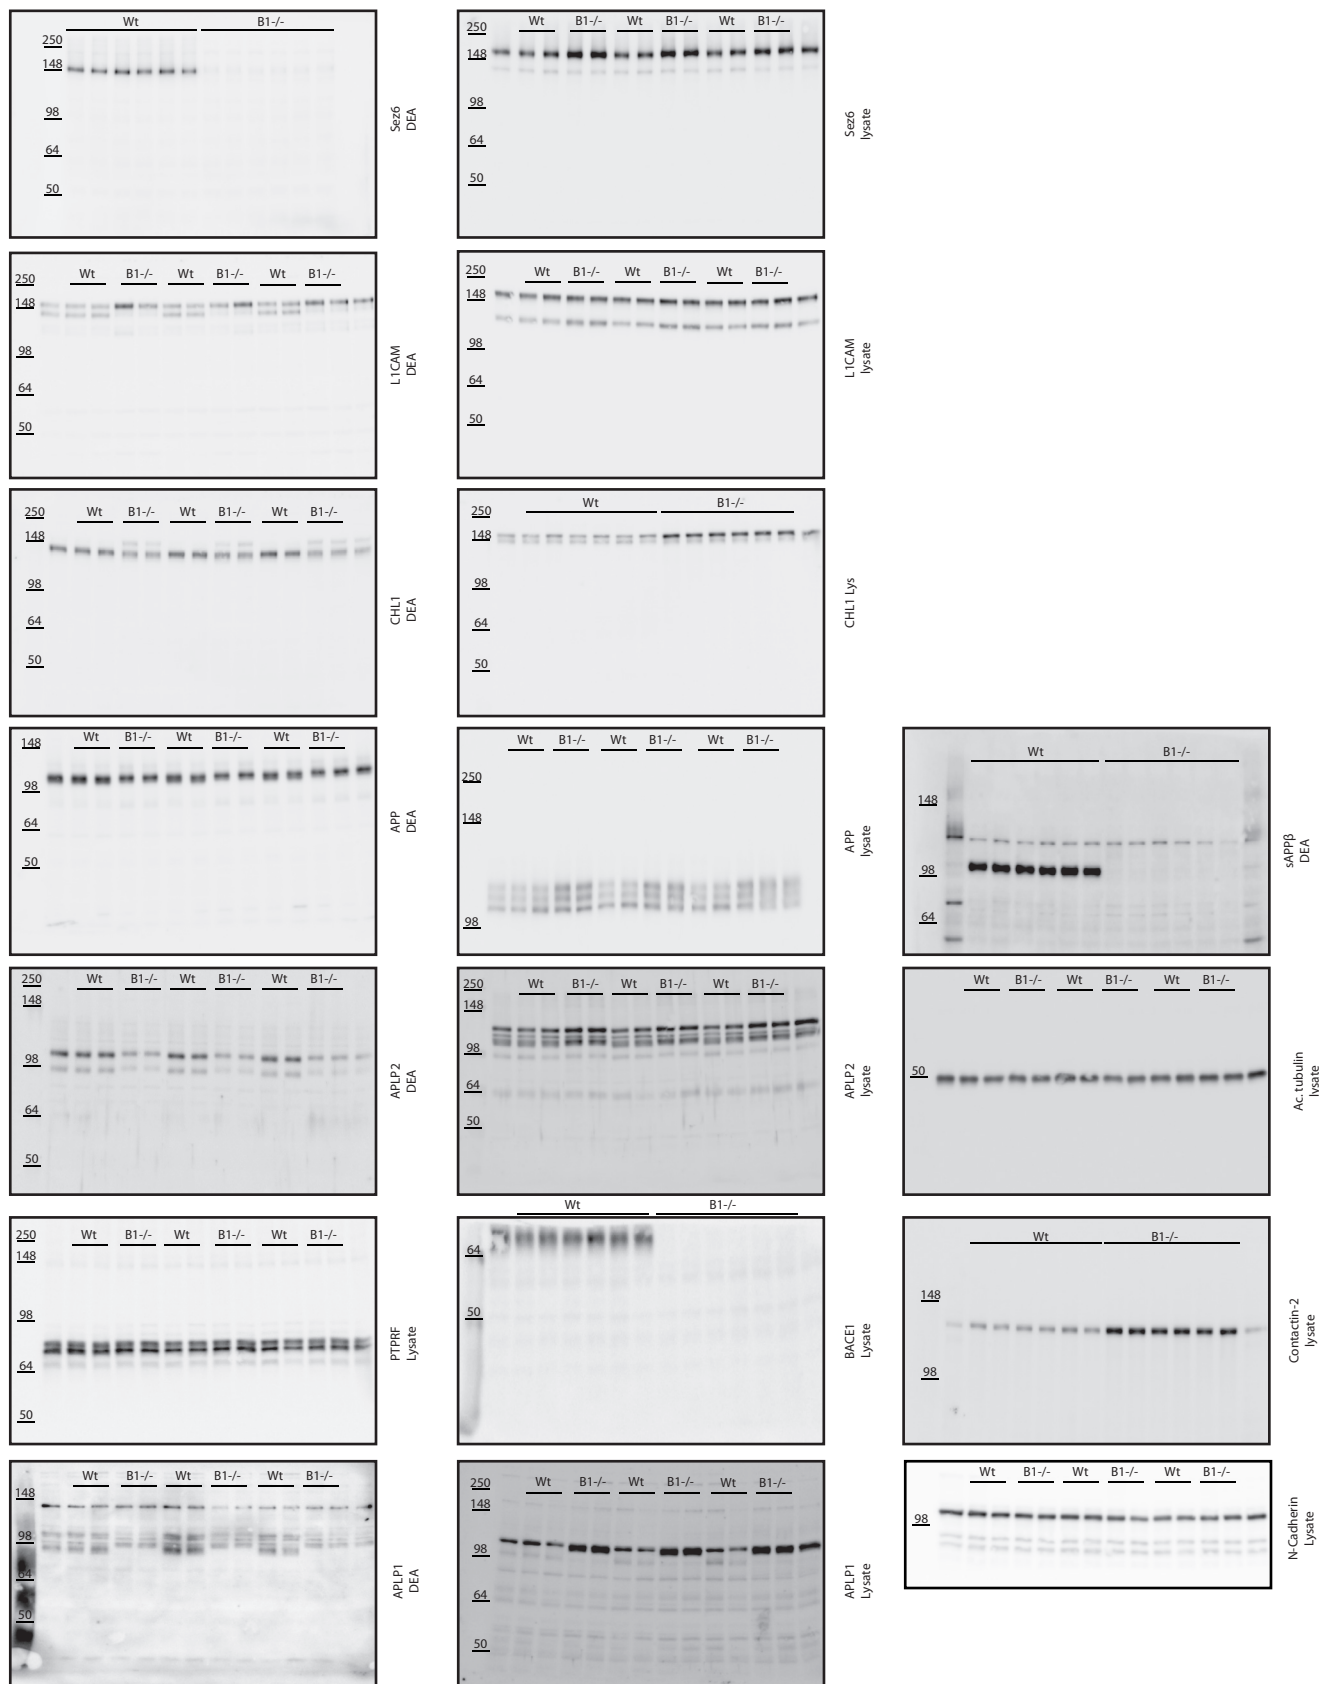

Supplement: emboj2012173s12.pdf [file emboj2012173s12.pdf]

# Blots of Figure 5

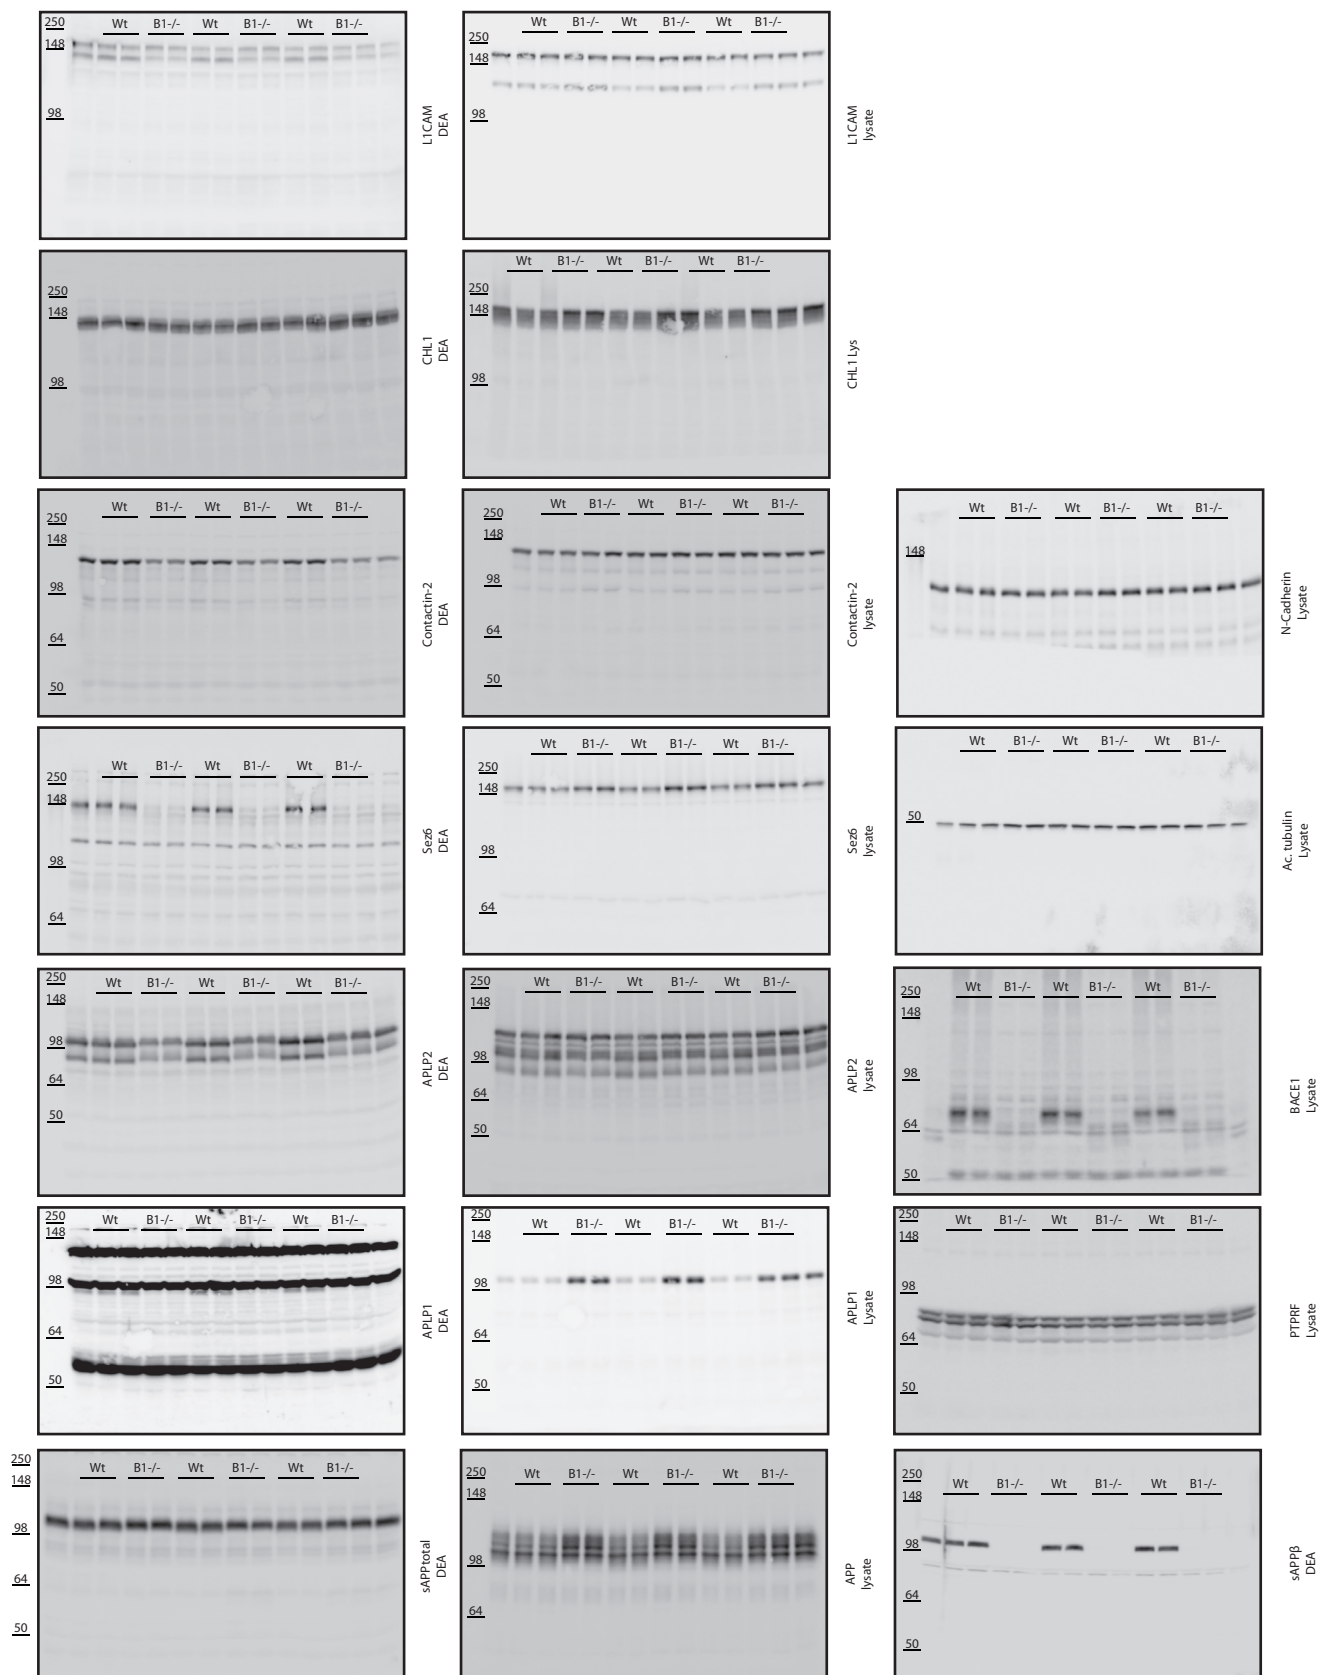

Supplement: emboj2012173s13.pdf [file emboj2012173s13.pdf]

# Blots of Figure 6

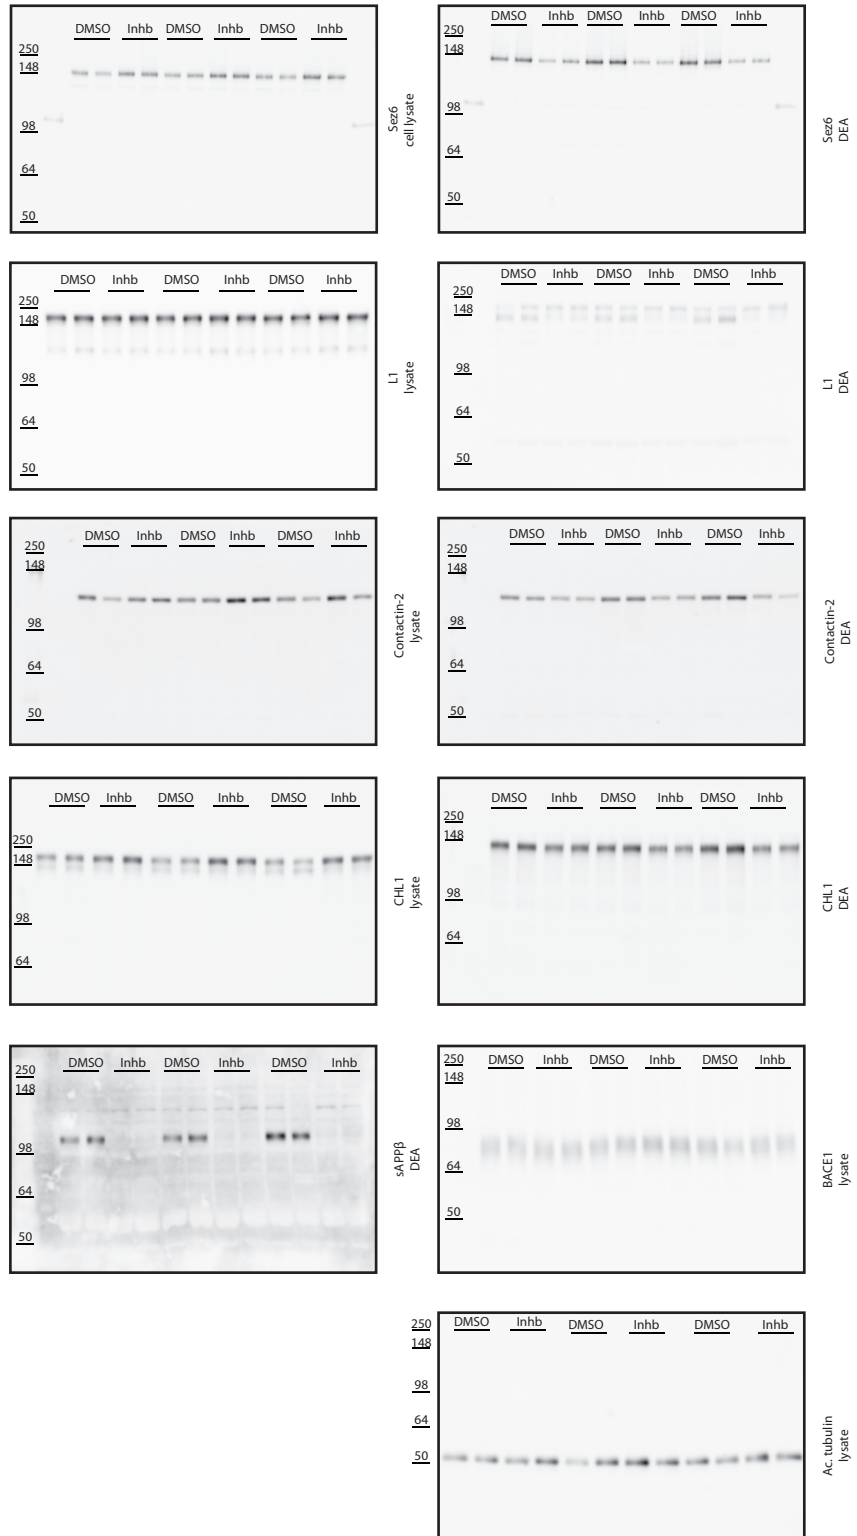

Supplement: emboj2012173s14.pdf [file emboj2012173s14.pdf]
